# Supplementary material
Source: publisher figshare collection journal article supplement (https://plos.figshare.com/ndownloader/files/40892996)
Supplement: Supplementary file [file 40892996]

**S2 Table: Variation of scaling exponent of MSD**

| Type                                 | Theory           | Simulation<br>LJ strength<br>$\epsilon$ | Fits to<br>simulation <sup>2</sup><br>$\phi = 0.4$ | Fits to<br>simulation <sup>3</sup><br>(unconfined) |
|--------------------------------------|------------------|-----------------------------------------|----------------------------------------------------|----------------------------------------------------|
| Disconnected noninteracting beads    | $\lambda = 1$    | $\epsilon = 0$                          | $\lambda = 1$                                      |                                                    |
| Disconnected interacting beads [1]   | $\lambda = 3/4$  | $\epsilon = 0.25, 0.5$                  | $\lambda = 0.8$                                    |                                                    |
| Phantom polymer (Rouse dynamics [2]) | $\lambda = 1/2$  | $\epsilon = 0$                          | $\lambda = 0.5$                                    | $\lambda = 0.5$                                    |
| Polymer in good solvent <sup>1</sup> | $\lambda = 6/11$ | $\epsilon = 0.25$                       | $\lambda = 0.4$                                    | $\lambda = 0.5$                                    |
| Polymer in poor solvent <sup>1</sup> | $\lambda = 2/5$  | $\epsilon = 0.5$                        | $\lambda = 0.4$                                    | $\lambda = 0.25$                                   |
| Polymer melts (reptation [3])        | $\lambda = 1/4$  | $\epsilon = 1$                          |                                                    | $\lambda = 0.25$                                   |

<sup>1</sup> Polymer of length  $M$  that is confined in a space has scaling exponent of MSD  $\lambda = \frac{2\nu}{2\nu+1}$ , where  $\nu$  is related with MSD  $\sim M^{2\nu}$  [4].

<sup>2</sup> S7 Fig

<sup>3</sup> S5 Fig

**Table:** MSD,  $\langle r^2 \rangle \sim \tau^\lambda$

## References

- [1] Bénichou O, Illien P, Oshanin G, Sarracino A, Voituriez R. Diffusion and subdiffusion of interacting particles on comblike structures. Physical review letters. 2015;115(22):220601.
- [2] De Gennes PG. Quasi-elastic scattering of neutrons by dilute polymer solutions: I. Free-draining limit. Physics Physique Fizika. 1967;3(1):37.
- [3] De Gennes PG. Reptation of a polymer chain in the presence of fixed obstacles. The journal of chemical physics. 1971;55(2):572–579.
- [4] Liu L, Shi G, Thirumalai D, Hyeon C. Chain organization of human interphase chromosome determines the spatiotemporal dynamics of chromatin loci. PLoS computational biology. 2018;14(12):e1006617.
